# Supplementary material
Source: PubMed Central journal article supplement (PMC6943357)
Supplement: ajcr0009-2665-f8.pdf [file ajcr0009-2665-f8.pdf]

miR-3196 suppresses hepatocellular carcinoma cell survival

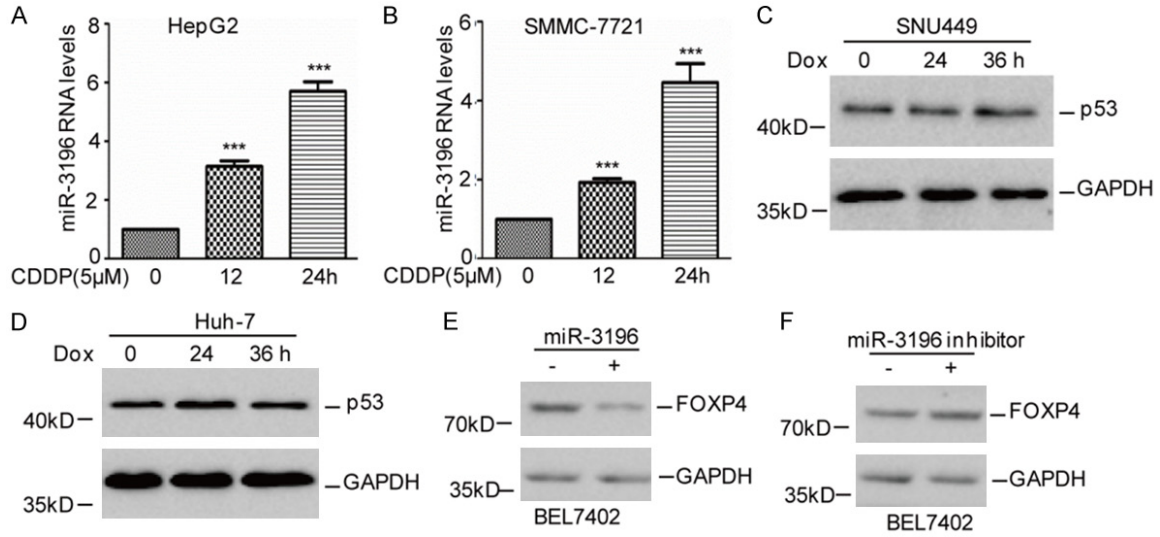

**Figure S1.** A, B. HepG2 and SMMC-7721 cells were treated with 5 μM cisplatin (CDDP) for indicated times. The RNA levels of miR-3196 were analyzed by q-RT-PCR. The data represent the means ± SD of three independent experiments; \*\*P<0.01, \*\*\*P<0.001 vs. control. C, D. SNU449 and Huh-7 cells were treated with 2 μM Dox for indicated times. The protein levels of p53 were detected by western blotting. E, F. miR-3196 or miR-3196 inhibitor was transfected into BEL7402 cells and the expression levels of FOXP4 were analyzed by western blotting.
